# Supplementary material for: A decade of antiretroviral therapy in Uganda: what are the emerging causes of death?
Source: Springer Nature journal article supplement (doi:10.1186/s12879-019-3724-x), 2019-01-21

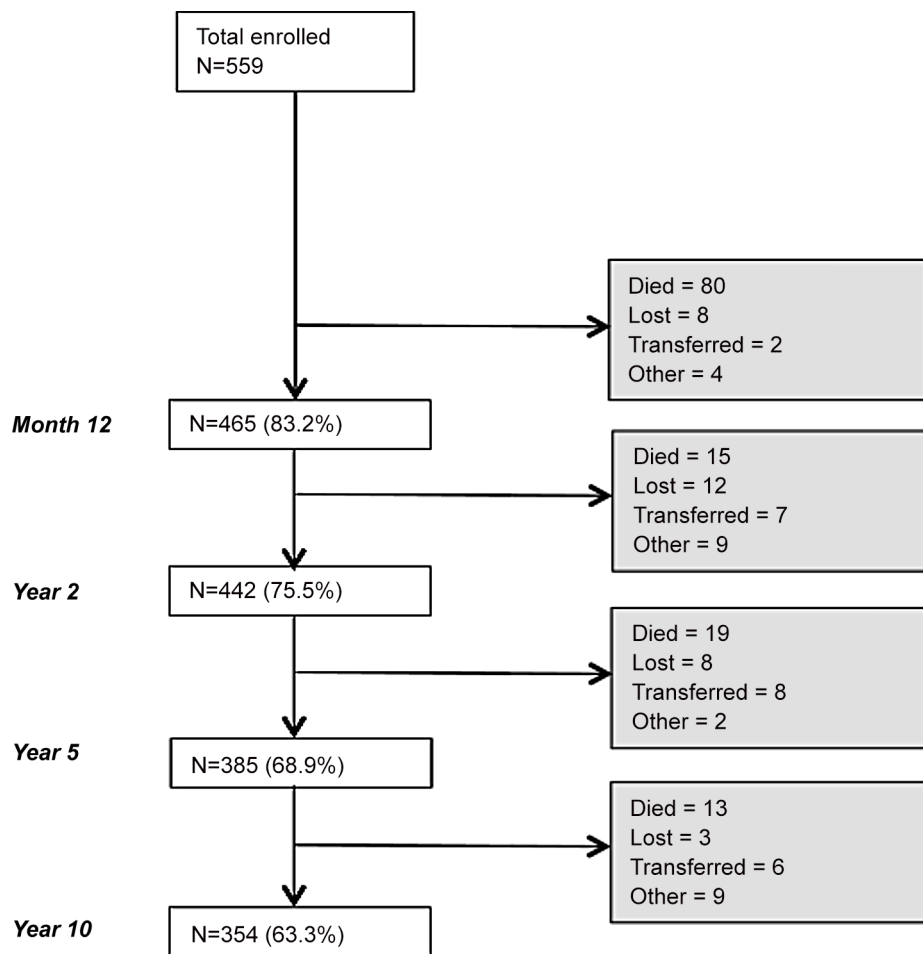

Supplement: MOESM1 [file 16409224]
